# Supplementary material for: Quantitative Estimation of Menthol, Glycerol and 1,2-Propylene Glycol in Tobacco Products Available in India
Source: Research Square preprint supplement (doi:10.21203/rs.3.rs-6161281/v1), 2025-04-21
Supplement: Supplementary file 1 [file 35fe7db5e79347acedf34593.pdf]

## Supplementary Information

# Quantitative Estimation of Menthol, Glycerol and 1,2-Propylene Glycol in Tobacco Products Available in India

Prasenjit Saha\*<sup>1</sup>, Doli Rani Das<sup>1</sup>, Abhishek Kumar Yadav<sup>1</sup>, Sanjib Kumar Sarma<sup>1</sup>, Kalyan Jyoti Borah<sup>1</sup>, Dinesh Kumar<sup>1,2</sup>

**Materials:** The internal standard *trans*-Anethole, 99% (CAS: 4180-23-8) and 1,3 – Butanediol, 99.5% (CAS: 107-88-0) were purchased from Sigma –Aldrich Co. The standard Menthol (99.9%, analytical standard) were purchased form Supelco, Merck. The standard Glycerol (>99%) and 1,2-Propylene Glycol (>99%) were purchased from Sigma –Aldrich Co. HPLC grade methanol were purchased from Rankem.

### **Method for the Determination of Menthol<sup>1</sup>:**

#### **Sample Preparation for Analysis of Menthol:**

**For Bidi Samples:** Sufficient quantity of bidi tobacco filler were combined and mixed to constitute at least 10 g for each test portion and kept in an airtight amber bottle or container.

**For Smokeless Tobacco Samples:** Sufficient amount of smokeless tobacco sample sachets were opened and mixed to constitute at least 10 g for each test portion and kept in an airtight amber bottle or container.

**Extraction Solvent (500 mg/L):** *trans*-Anethole (99%) was used as an internal standard for the preparation of extraction solvent. 500 mg of Anethole was transferred to 1 L volumetric flask and the volume was made up with methanol.

**Preparation of Calibration Standard:** The menthol calibration standard were prepared in the range of 20 - 1000 mg/L. At least 5 calibration standards were used for the plotting of calibration curve. If the sample contain higher than the prepared calibration standard then the sample was diluted and the sample was re-analyzed again.

**Sample Preparation for Cigarette Samples:** Two cigarettes were taken out from the test sample. The cigarettes were slit longitudinally and separated them into cut filler and non-tobacco materials (NTMs; cigarette paper, filter and tipping paper etc.). All materials (cut filler and NTMs) were transferred into the extraction vessel and 40 ml of extraction solvent were pipette out into the extraction vessel. The extraction vessel is placed in an orbital shaker and was shaken for 2 hours. After shaking was completed, the extraction liquid is filtered through 0.22 micron nylon syringe filter and transferred to autosampler amber colored vial and analysed by Gas Chromatograph - FID. If the extract was not analysed on the same day, the solution is stored in a refrigerator.

For the cigarette sample containing menthol ball or capsules, the above procedure was followed with additional steps. The cigarette sample contain menthol ball /capsule in the filter of cigarette and the menthol ball may be broken by pressing the filter with hand without removing the ball / capsule from the filter of cigarette and immediately the filter was transferred to the conical flask.

**Sample Preparation for Bidi and Smokeless Tobacco Samples:** 1.0 g (weigh 0.001 accuracy) of the tobacco was transferred into the extraction vessel and 40 ml of extraction solvent was pipetted out into the extraction vessel. The extraction vessel was placed in orbital shaker and shaken at 200 RPM for 2 hours. After shaking was completed, the liquid was filtered through 0.22 micron syringe filter and transferred to autosampler amber colored vial and analyzed by Gas Chromatograph - FID. If the extract was not analyzed on the same day, the solution was stored in a refrigerator.

#### **Method for the determination of Glycerol and 1,2-Propylene Glycol<sup>2</sup>:**

##### **Sample Preparation for Analysis:**

**For Cigarette and Bidi Samples:** Sufficient quantity of cigarette and bidi tobacco filler were combined and mixed to constitute at least 20 g for each test portion and keep in an airtight amber bottle or container.

**For Smokeless Tobacco Samples:** Sufficient amount of smokeless tobacco sample sachets were opened and mixed to constitute at least 10 g for each test portion and kept in an airtight amber bottle or container.

**Extraction Solution (2000 mg/L):**

Primary Stock (200 mg/mL): 5 g 1,3 butanediol was transferred to 25 mL volumetric flask and volume of the flask was made up with methanol.

Preparation of extraction solution (2000 mg/L): 10 mL primary stock was transferred to 1 L volumetric flask and volume of the flask was made up with methanol.

**Preparation of Calibration Standard:** Glycerol and 1,2-Propylene Glycol calibration standard were prepared in the range of 80 - 3200 mg/L and 30 - 2400 mg/L respectively. At least 5 calibration standards were used for the plotting of calibration curve. If the sample contain higher than the prepared calibration standard then the sample was diluted and the sample was analyzed again.

**Sample Preparation for cigarette, and Bidi samples:** 4.0 g (weigh 0.001 accuracy) of the sample is taken in 100 ml conical flask and 50 mL of extraction solvent was added using pipette. The solution was shaken at 210 rpm for 60 min. The samples was removed from the shaker and the samples stand undisturbed until the supernatant was clear. The sample solution was filtered through 0.22 micron nylon syringe filter and transferred to an autosampler amber colored vial, and analyzed by GC-FID. (Storage if required: 2-4 °C in dark).

**Sample Preparation for smokeless tobacco samples:** 2.0 g (weigh 0.001 accuracy) of the sample is taken in 100 ml conical flask and 50 mL of extraction solvent was added using pipette. The solution was shaken at 210 rpm for 60 min. The samples was removed from the shaker and the samples stand undisturbed until the supernatant was clear. The sample solution was filtered through 0.22 micron nylon syringe filter and transferred to an autosampler amber colored vial, and analyzed by GC-FID. (Storage if required: 2-4 °C in dark).

**Table 1: Determination of menthol content in 35 brands of zarda / chewing tobacco (SLT) samples.**

| Sl. No. | Brand name   | Menthol (mg/g) | Sl. No. | Brand name        | Menthol (mg/g) |
|---------|--------------|----------------|---------|-------------------|----------------|
| 1       | Ratna 64     | 1.67 (0.03)    | 19      | Shivdata 355      | 9.19 (0.15)    |
| 2       | Kanak Deluxe | 2.24 (0.23)    | 20      | Balaji-128 deluxe | 9.25 (0.04)    |
| 3       | PP           | 3.36 (1.05)    | 21      | Baba -120         | 8.70 (1.22)    |
| 4       | Baba Black   | 3.90 (0.40)    | 22      | Mastana 142       | 9.45 (0.06)    |

| Sl. No. | Brand name  | Menthol (mg/g) | Sl. No. | Brand name            | Menthol (mg/g) |
|---------|-------------|----------------|---------|-----------------------|----------------|
| 5       | SNT -1      | 4.35 (0.62)    | 23      | MJ Zarda Patti        | 10.22 (0.17)   |
| 6       | Suravi 55   | 4.57 (0.18)    | 24      | Krishna 60            | 10.27 (0.08)   |
| 7       | Gopal Green | 4.97 (0.16)    | 25      | Baba-160              | 11.46 (0.30)   |
| 8       | V-1         | 5.69 (0.81)    | 26      | KP Double Black       | 13.72 (1.27)   |
| 9       | BHR         | 6.64 (0.63)    | 27      | Sigma Tobacco         | 13.78 (0.16)   |
| 10      | Sourabi 58  | 6.80 (0.26)    | 28      | Parijat Tobacco       | 13.9 (0.31)    |
| 11      | SS-1        | 7.18 (0.71)    | 29      | Green label           | 14.18 (1.28)   |
| 12      | KC 2000     | 7.42 (0.27)    | 30      | Gopal - 132           | 14.39 (0.98)   |
| 13      | Action 7    | 7.52 (0.17)    | 31      | Silver class-2        | 14.01 (0.92)   |
| 14      | Gopal 60    | 7.89 (0.59)    | 32      | Classic Zafrani Zarda | 19.84 (0.24)   |
| 15      | Baba 54     | 8.12 (0.06)    | 33      | Ashirbad              | 21.13 (0.28)   |
| 16      | Tulsi       | 8.56 (0.27)    | 34      | Ratna Tobacco 300     | 21.81 (0.22)   |
| 17      | Sonali 155  | 8.82 (0.27)    | 35      | UK tobacco No. 3300   | 26.99 (0.46)   |
| 18      | M-4         | 8.85 (0.34)    |         |                       |                |

The samples were analyzed and the mean value was presented. Standard deviation (SD) was shown in parenthesis.

**Table 2:** Menthol content in different brands of smokeless tobacco samples (Gul, Gurakhu, Snuff, Snus, Sada, Khaini and Kiwam).

| Sl. No. | Brand Name                   | Types of SLT | Mean Menthol (mg/g) | Sl. No. | Brand Name                    | Types of SLT | Mean Menthol (mg/g) |
|---------|------------------------------|--------------|---------------------|---------|-------------------------------|--------------|---------------------|
| 1       | AQ Premium Kara Gul          | Gul          | ND                  | 23      | Singham Khaini                | Khaini       | ND                  |
| 2       | Chand tara marka special gul |              | ND                  | 24      | Chandan Khaini                |              | ND                  |
| 3       | Dulhan Gul                   |              | ND                  | 25      | Dada Khaini                   |              | ND                  |
| 4       | Gulab marka Gul              |              | ND                  | 26      | Nevla Tobacco                 |              | ND                  |
| 5       | Kale Gulab marka Gul         |              | ND                  | 27      | New Lucky Khaini              |              | ND                  |
| 6       | Khan Ka Gul                  |              | ND                  | 28      | Rakesh Khaini                 |              | ND                  |
| 7       | Kohinoor Gul                 |              | ND                  | 29      | Arif Khaini                   |              | 0.32 (0.01)         |
| 8       | Noor Ka Gul                  |              | ND                  | 30      | Swagat No. 1                  |              | 1.5 (0.01)          |
| 9       | S. S. Special Kara Gul       |              | ND                  | 31      | Afgan Rally                   |              | 2.8 (0.01)          |
| 10      | Sameer Ka Gul                |              | ND                  | 32      | Dilkhush khaini Spitt tobacco |              | 3.5 (0.03)          |

| Sl. No. | Brand Name           | Types of SLT   | Mean Menthol (mg/g) | Sl. No. | Brand Name                  | Types of SLT | Mean Menthol (mg/g) |
|---------|----------------------|----------------|---------------------|---------|-----------------------------|--------------|---------------------|
| 11      | Annapurna Gurakhu    | Gurakhu        | ND                  | 33      | Saajan Khaini               | Sada         | 4.0 (0.11)          |
| 12      | Trishul Gurakhu      |                | ND                  | 34      | Bandar Brand XXX            |              | 4.6 (0.03)          |
| 13      | Tobacco Gurakhu      |                | ND                  | 35      | Chunnu Right Choice         |              | 6.0 (0.06)          |
| 14      | Tobacco Gurakhu      |                | ND                  | 36      | Raja Tobacco                |              | 8.7 (1.24)          |
| 15      | Parbati kara Gurakhu |                | ND                  | 37      | Golden Sada                 |              | 3.5 (0.16)          |
| 16      | Tarakeshwar Gurakhu  |                | ND                  | 38      | Suraj Chaap Tambaku         |              | 0.23 (0.02)         |
| 17      | Shiv Shakti Gurakhu  |                | ND                  | 39      | Banadar Sada (Paper Packet) |              | ND                  |
| 18      | N. C. Madras Snuff   | Snuff          | ND                  | 40      | J.A. P.D.M Patta Sada       | Kiwam        | ND                  |
| 19      | N. K. Madras Snuff   |                | ND                  | 41      | Joyguru Sada                |              | ND                  |
| 20      | No 1 NC Gold Snuff   |                | ND                  | 42      | Kaka sada                   |              | 0.34 (0.11)         |
| 21      | Chaini Tobacco       | Pouch Khaini / | 7.6 (0.5)           | 43      | Tulsi Royal Special Kiwam   | Kiwam        | 24.9 (1.15)         |
| 22      | Bolt Filter          | Snus           | 8.3 (0.3)           | 44      | Raj Ratan tobacco           |              | 13.0 (0.18)         |

The samples were analyzed and the mean value was presented. Standard deviation (SD) was shown in parenthesis. ND: Not detected in the sample. Limit of Detection = 0.014 mg/g.

**Table 3:** Determination of Menthol content in different brands of cigarette samples.

| Sl. No. | Brand Name                         | Menthol (mg/Cig.) |
|---------|------------------------------------|-------------------|
| 1       | Silk Cut                           | 0.02 (0.001)      |
| 2       | Gold flake Premium Honey Dew Blend | 0.07 (0.02)       |
| 3       | Gold Flake Indie Mint              | 2.28 (0.04)       |
| 4       | Total                              | 3.28 (0.79)       |
| 5       | Wave Cool Mint                     | 3.88 (0.14)       |
| 6       | Wave                               | 3.86 (0.01)       |
| 7       | Wave Fruit Mint                    | 5.14 (0.01)       |
| 8       | Players                            | 5.20 (0.26)       |
| 9       | Topaz                              | 6.40 (0.22)       |
| 10      | Classic                            | 7.38 (0.06)       |

| Sl. No. | Brand Name                         | Menthol (mg/Cig.) |
|---------|------------------------------------|-------------------|
| 11      | Marlboro                           | 9.27 (0.05)       |
| 12      | Flake                              | ND                |
| 13      | Classic Refined Taste              | ND                |
| 14      | Classic Balanced Taste             | ND                |
| 15      | Wills Navy Cut                     | ND                |
| 16      | Cavanders Gold                     | ND                |
| 17      | Gold Flake                         | ND                |
| 18      | P-10 premium                       | ND                |
| 19      | Charms                             | ND                |
| 20      | U -10                              | ND                |
| 21      | Gold Flake Kings Honey dew Smooth  | ND                |
| 22      | Four Square Special Advanced Taste | ND                |
| 23      | H-10 Filter                        | ND                |
| 24      | Esse Lights                        | ND                |
| 25      | Sunils Filter                      | ND                |
| 26      | WIN                                | ND                |
| 27      | Djarum Black                       | ND                |
| 28      | Scissors                           | ND                |

The samples were analyzed and the mean value was presented. Standard deviation (SD) was shown in parenthesis.

**Table 4:** Determination of Menthol content in different brands of Bidi Samples.

| Sl. No. | Brand Name        | Menthol (mg/g) |
|---------|-------------------|----------------|
| 1       | Royal Tara Biri   | ND             |
| 2       | Sagar Bidi        | ND             |
| 3       | Pal Bidi          | 0.15 (0.01)    |
| 4       | Nandini Bidi      | <LOQ           |
| 5       | Lallu bidi        | ND             |
| 6       | No. 1 mantu bidi  | ND             |
| 7       | Janata Biri       | ND             |
| 8       | Mother India Biri | <LOQ           |
| 9       | Sankha Biri       | 0.21 (0.001)   |
| 10      | Jadu Biri         | ND             |
| 11      | Pataka Bidi       | ND             |
| 12      | Deep Bidi         | ND             |
| 13      | Saheb Bidi        | ND             |

|           |                |    |
|-----------|----------------|----|
| <b>14</b> | Sushantor Bidi | ND |
| <b>15</b> | Mondoler Bidi  | ND |

The samples were analyzed and the mean value was presented. Standard deviation (SD) was shown in parenthesis. Limit of Detection = 0.014 mg/g. Limit of Quantitation (LOQ) = 0.042 mg/g.

**Table 5:** Determination of Additives (Glycerol and 1,2-Propylene Glycol) in 35 different representative brands of chewing tobacco and zarda samples:

| Sl. No.   | Brand Name          | Humectant          |                             |
|-----------|---------------------|--------------------|-----------------------------|
|           |                     | Glycerol (mg/g)    | 1,2-Propylene glycol (mg/g) |
|           |                     | Range: 0.9 – 185.3 | Range: ND – 40.8            |
| <b>1</b>  | Baba 120            | 0.93 (0.07)        | 1.48 (0.06)                 |
| <b>2</b>  | Baba 54             | 0.97 (0.13)        | 1.05 (0.02)                 |
| <b>3</b>  | Sonali 155          | 1.1 (0.01)         | ND                          |
| <b>4</b>  | Tulsi               | 1.2 (0.01)         | 4.9 (4.5)                   |
| <b>5</b>  | Baba 160            | 1.4 (0.01)         | 1.4 (0.14)                  |
| <b>6</b>  | Sourabi 58          | 1.5 (0.06)         | ND                          |
| <b>7</b>  | Shivdata 355        | 2.2 (0.02)         | ND                          |
| <b>8</b>  | MJ Zarda Patti      | 3.2 (0.4)          | 0.6 (0.03)                  |
| <b>9</b>  | BHR                 | 4.4 (0.4)          | 4.6 (0.46)                  |
| <b>10</b> | SNT-1               | 9.3 (1.2)          | ND                          |
| <b>11</b> | V-1                 | 20.5 (2.8)         | ND                          |
| <b>12</b> | Action 7            | 21.8 (0.4)         | 1.7 (0.4)                   |
| <b>13</b> | KP Double black     | 23.8 (2.4)         | 23.7 (3.5)                  |
| <b>14</b> | KP Silver class-2   | 24.4 (0.8)         | 27.5 (0.6)                  |
| <b>15</b> | KC 2000             | 26.5 (2.6)         | 40.8 (1.1)                  |
| <b>16</b> | Green Label         | 27.3 (3.0)         | 28.2 (3.2)                  |
| <b>17</b> | Gopal Green         | 28.5 (4.4)         | <LOQ                        |
| <b>18</b> | Mastana 142         | 28.7 (0.05)        | 1.6 (0.01)                  |
| <b>19</b> | M-4                 | 37.1 (4.3)         | 18.1 (0.04)                 |
| <b>20</b> | UK tobacco No. 3300 | 39.1 (0.6)         | 1.4 (0.01)                  |
| <b>21</b> | SS-1                | 39.7 (2.3)         | <LOQ                        |
| <b>22</b> | Gopal 132           | 42.2 (1.3)         | 3.3 (0.16)                  |
| <b>23</b> | Suravi 55           | 45.0 (0.6)         | ND                          |
| <b>24</b> | Gopal 60            | 45.9 (3.9)         | 3.6 (0.27)                  |
| <b>25</b> | Parijat Tobacco     | 54.2 (0.24)        | ND                          |
| <b>26</b> | Ashirbad            | 55.4 (1.4)         | 11.8 (0.13)                 |

| Sl. No. | Brand Name            | Humectant       |                             |
|---------|-----------------------|-----------------|-----------------------------|
|         |                       | Glycerol (mg/g) | 1,2-Propylene glycol (mg/g) |
| 27      | Balaji-128 deluxe     | 57.6 (0.9)      | ND                          |
| 28      | Kanak Deluxe          | 65.7 (1.80)     | ND                          |
| 29      | Sigma Tobacco         | 78.7 (2.3)      | ND                          |
| 30      | Baba Black            | 83.7 (0.5)      | ND                          |
| 31      | PP                    | 86.2 (0.2)      | 4.0 (0.01)                  |
| 32      | Ratna 64              | 114.5 (0.7)     | ND                          |
| 33      | Classic Zafrani Zarda | 168.2 (1.2)     | 1.3 (0.01)                  |
| 34      | Krishna 60            | 177.6 (2.8)     | <LOQ                        |
| 35      | Ratna No. 300         | 185.3 (7.8)     | ND                          |

The samples were analyzed and the mean value was presented. Standard deviation (SD) was shown in parenthesis. ND: Below Detection limit. Limit of Detection (LOD) of Glycerol = 0.3 mg/g and 1,2-Propylene Glycol = 0.06 mg/g; Limit of Quantitation of Glycerol = 0.9 mg/g and 1,2-Propylene Glycol = 0.2 mg/g.

**Table 6:** Glycerol and 1,2-Propylene Glycol content in smokeless tobacco samples such as gul, gurakhu, snuff, sada and khaini products.

| Sl. No. | Brand name                   | Types of SLT | Glycerol (mg/g) | 1,2-Propylene Glycol (mg/g) |
|---------|------------------------------|--------------|-----------------|-----------------------------|
| 1       | AQ Premium Kara Gul          | Gul          | ND              | ND                          |
| 2       | Chand tara marka special gul |              | ND              | ND                          |
| 3       | Dulhan Gul                   |              | ND              | ND                          |
| 4       | Gulab marka Gul              |              | ND              | ND                          |
| 5       | Kale Gulab marka Gul         |              | ND              | ND                          |
| 6       | Khan Ka Gul                  |              | ND              | ND                          |
| 7       | Kohinoor Gul                 |              | ND              | ND                          |
| 8       | Noor Ka Gul                  |              | ND              | ND                          |
| 9       | S. S. Special Kara Gul       |              | ND              | 1.11 (0.06)                 |
| 10      | Sameer Ka Gul                |              | 1.12 (0.08)     | ND                          |
| 11      | Annapurna Gurakhu            | Gurakhu      | ND              | ND                          |
| 12      | Trishul Gurakhu              |              | ND              | ND                          |
| 13      | Tobacco Gurakhu              |              | ND              | ND                          |
| 14      | Tobacco Gurakhu              |              | ND              | ND                          |
| 15      | Parbati kara Gurakhu         |              | ND              | ND                          |



| Sl. No. | Brand name                    | Types of SLT        | Glycerol (mg/g) | 1,2-Propylene Glycol (mg/g) |
|---------|-------------------------------|---------------------|-----------------|-----------------------------|
| 16      | Tarakeshwar Gurakhu           | Snuff               | ND              | ND                          |
| 17      | Shiv Shakti Gurakhu           |                     | ND              | ND                          |
| 18      | N. C. Madras Snuff            |                     | ND              | ND                          |
| 19      | N. K. Madras Snuff            |                     | ND              | ND                          |
| 20      | No 1 NC Gold Snuff            |                     | ND              | ND                          |
| 21      | Chaini Tobacco                | Pouch khaini / Snus | 53.4 (3.2)      | 2.1 (0.01)                  |
| 22      | Bolt Filter                   |                     | 39.52 (0.12)    | 16.62 (0.05)                |
| 23      | Arif Khaini                   | khaini              | ND              | ND                          |
| 24      | Chandan Khaini                |                     | ND              | ND                          |
| 25      | Dada Khaini                   |                     | ND              | ND                          |
| 26      | Nevla Tobacco                 |                     | <LOQ            | ND                          |
| 27      | New Lucky Khaini              |                     | ND              | ND                          |
| 28      | Rakesh Khaini                 |                     | ND              | ND                          |
| 29      | Singham Khaini                |                     | ND              | ND                          |
| 30      | Swagat No. 1                  | khaini              | 4.56 (0.01)     | ND                          |
| 31      | Afgan Rally                   |                     | 1.23 (0.06)     | ND                          |
| 32      | Dilkhush khaini Spitt tobacco |                     | 2.50 (0.22)     | ND                          |
| 33      | Saajan Khaini                 |                     | ND              | ND                          |
| 34      | Bandar Brand XXX              |                     | <LOQ            | ND                          |
| 35      | Chunnu                        |                     | <LOQ            | ND                          |
| 36      | Raja Tobacco                  |                     | <LOQ            | 0.64 (0.03)                 |
| 37      | Golden Sada                   | Sada                | ND              | ND                          |
| 38      | Suraj Chaap Tambaku           |                     | ND              | ND                          |
| 39      | Banadar Sada (Paper Packet)   |                     | ND              | ND                          |
| 40      | J.A. P.D.M Patta Sada         |                     | ND              | ND                          |
| 41      | Joyguru Sada                  |                     | ND              | ND                          |
| 42      | Kaka sada                     |                     | ND              | ND                          |
| 43      | Tulsi Royal Special Kiwam     | Kiwam               | 2.3 (0.05)      | 23.9 (1.3)                  |
| 44      | Raj Ratan tobacco             |                     | 456.3 (17.6 )   | ND                          |

The samples were analyzed and the mean value was presented. Standard deviation (SD) was shown in parenthesis. ND: Not detected in the sample. Limit of Detection (LOD) of Glycerol = 0.3 mg/g and 1,2-Propylene Glycol = 0.06 mg/g; Limit of Quantitation of Glycerol = 0.9 mg/g and 1,2-Propylene Glycol = 0.2 mg/g

**Table 7:** Determination of additives (glycerol and 1,2-propylene glycol) in different brands of cigarette samples (Smoke Tobacco):

| Sl. No. | Brand Name                            | Glycerol (mg/g) | 1,2-Propylene Glycol<br>PG (mg/g) |
|---------|---------------------------------------|-----------------|-----------------------------------|
| 1       | P-10 premium                          | ND              | ND                                |
| 2       | Charms                                | ND              | 0.9 (0.01)                        |
| 3       | H-10 Filter                           | ND              | <LOQ                              |
| 4       | Sunils Filter                         | ND              | <LOQ                              |
| 5       | U -10                                 | 1.06 (0.04)     | ND                                |
| 6       | Djarum Black                          | 2.16 (0.08)     | 10.70 (0.4)                       |
| 7       | Gold Flake Kings Honey dew<br>Smooth  | 2.17 (0.6)      | <LOQ                              |
| 8       | Topaz                                 | 4.39 (0.07)     | 3.02 (0.10)                       |
| 9       | Four Square Special Advanced<br>Taste | 5.40 (0.13)     | 3.89 (0.10)                       |
| 10      | Wave Cool Mint                        | 5.7 (0.23)      | 0.5 (0.01)                        |
| 11      | Total                                 | 6.4 (0.4)       | 1.0 (0.13)                        |
| 12      | Cavanders Gold                        | 7.5 (0.34)      | 2.5 (0.22)                        |
| 13      | WIN                                   | 7.90 (0.01)     | 4.96 (0.28)                       |
| 14      | Classic                               | 8.21 (0.03)     | 3.33 (0.01)                       |
| 15      | Classic Refined Taste                 | 9.5 (0.14)      | <LOQ                              |
| 16      | Scissors                              | 9.60 (0.08)     | ND                                |
| 17      | Flake                                 | 11.2 (1.3)      | <LOQ                              |
| 18      | Wave Fruit Mint                       | 10.12 (0.4)     | 0.33 (0.01)                       |
| 19      | Gold Flake                            | 10.2 (0.9)      | <LOQ                              |
| 20      | Wills Navy Cut                        | 12.6 (1.3)      | <LOQ                              |
| 21      | Wave                                  | 12.2 (0.5)      | 0.3 (0.01)                        |
| 22      | Players                               | 12.6 (1.3)      | <LOQ                              |
| 23      | Silk Cut                              | 14.2 (0.04)     | 0.6 (0.04)                        |
| 24      | Gold Flake Indie Mint                 | 14.95 (0.20)    | 0.6 (0.01)                        |
| 25      | Gold Flake Premium Honey<br>Dew Blend | 18.0 (1.4)      | 0.7 (0.1)                         |

| Sl. No. | Brand Name             | Glycerol (mg/g) | 1,2-Propylene Glycol PG (mg/g) |
|---------|------------------------|-----------------|--------------------------------|
| 26      | Esse Lights            | 17.71 (0.44)    | 4.96 (0.3)                     |
| 27      | Classic balanced Taste | 21.03 (0.4)     | 1.05 (0.01)                    |
| 28      | Marlboro               | 22.33 (0.4)     | 2.18 (0.01)                    |

The samples were analyzed and the mean value was presented. Standard deviation (SD) was shown in parenthesis. LOQ of Glycerol = 0.9 mg/g and LOQ of 1,2-Propylene glycol = 0.2 mg/g).

**Table 8:** Determination of Glycerol and 1,2-Propylene Glycol content in different brands of Bidi Samples (smoke).

| Sl. No. | Brand Name        | Glycerol (mg/g) | 1,2-Propylene Glycol (mg/g) |
|---------|-------------------|-----------------|-----------------------------|
| 1       | Royal Tara Biri   | ND              | ND                          |
| 2       | Lallu bidi        | ND              | ND                          |
| 3       | Mother India Biri | ND              | ND                          |
| 4       | Sankha Biri       | ND              | ND                          |
| 5       | Janata Biri       | ND              | ND                          |
| 6       | Jadu Biri         | ND              | ND                          |
| 7       | Mondoler Bidi     | ND              | ND                          |
| 8       | Sagar Bidi        | 1.1 (0.07)      | ND                          |
| 9       | Nandini Bidi      | 1.41 (0.01)     | ND                          |
| 10      | No. 1 mantu bidi  | 1.42 (0.01)     | ND                          |
| 11      | Pal Bidi          | 1.71 (0.01)     | ND                          |
| 12      | Sushantor Bidi    | 1.72 (0.01)     | ND                          |
| 13      | Saheb Bidi        | 1.81 (0.01)     | ND                          |
| 14      | Pataka Bidi       | 2.06 (0.01)     | ND                          |
| 15      | Deep Bidi         | 3.63 (0.03)     | ND                          |

The samples were analyzed and the mean value was presented. Standard deviation (SD) was shown in parenthesis. ND: Not detected in the sample. Limit of Detection (LOD) of Glycerol = 0.3 mg/g and 1,2-Propylene Glycol = 0.06 mg/g; Limit of Quantitation of Glycerol = 0.9 mg/g and 1,2-Propylene Glycol = 0.2 mg/g

#### References:

1. Determination of Menthol in Cigarettes and Cut Filler by Gas Chromatography. CORESTA Recommended Method No. 92 (2019).

2. Standard Operating Procedure for the Determination of Humectants in Cigarette Tobacco Filler. WHO TobLabNet Official Method SOP 06 (2016).
